# Supplementary material for: Coordination features of a terpyridine-containing polyamine receptor. Effect of protonation on the photophysical properties of the complexes
Source: Royal Society of Chemistry journal article supplement (doi:10.1039/b609462g), 2006-01-01
Supplement: b609462g.pdf [file b609462g.pdf]

## Electronic supplementary information

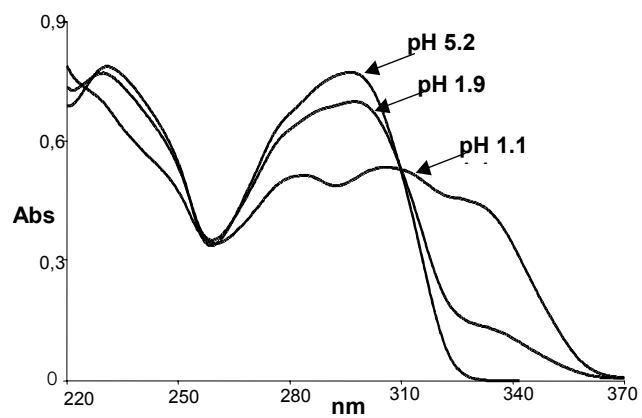

**Figure S1.** UV spectra of L at selected pH values ( $[L] = 5 \cdot 10^{-5}$  M,  $T = 298$  K, 0.1 M  $\text{NMe}_4\text{Cl}$ )

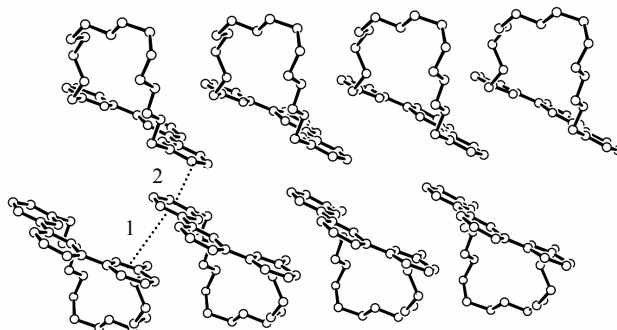

**Figure S2.** Crystal packing of [H<sub>5</sub>L]Br<sub>5</sub>·2H<sub>2</sub>O, displaying the two different  $\pi$ - $\pi$  interactions between terpyridine units of symmetry related cations (1: symmetry operation  $1+x, y, z$ , interplanar distance: 3.6 Å; 2: symmetry operation  $-x, -y, -z$ , interplanar distance 3.7 Å).

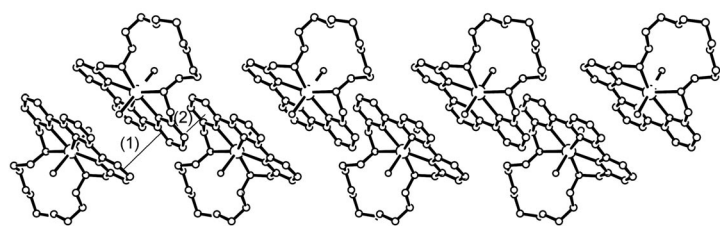

*a*

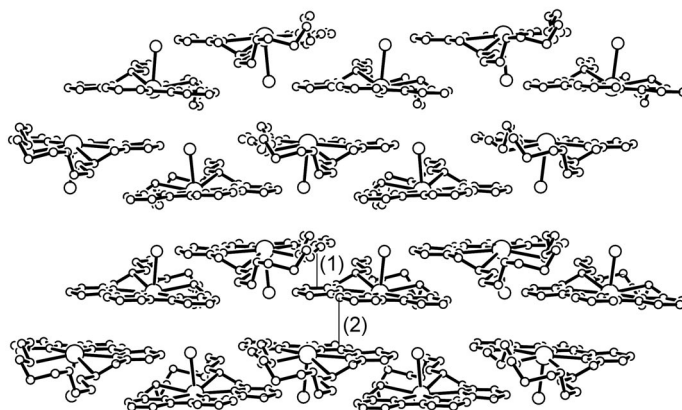

*b*

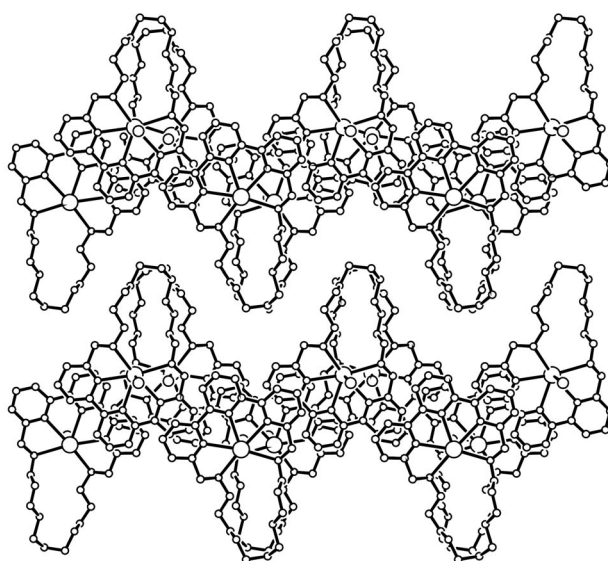

*c*

**Figure S3.** (a) Crystal packing of the complex **a**, displaying the two different  $\pi$ - $\pi$  interactions, (1) and (2), between terpyridine units of symmetry related complexes [(1): symmetry operation  $-x, -y, 1-z$ , interplanar distance: 3.6 Å; (2): symmetry operation  $-x, 1-y, 1-z$ , interplanar distance 3.8 Å]. (b) side view of the crystal packing of complex **b**, displaying the two different  $\pi$ - $\pi$  interactions, (1) and (2), between symmetry related complexes [(1): symmetry operation  $0.5-x, 0.5+y, -z$ , interplanar distance: 3.6 Å; (2): symmetry operation  $-x, -y, -z$ , interplanar distance 3.6 Å]. (c) Top view of the crystal packing of **b**. In all cases the perchlorate anions have been omitted for clarity.

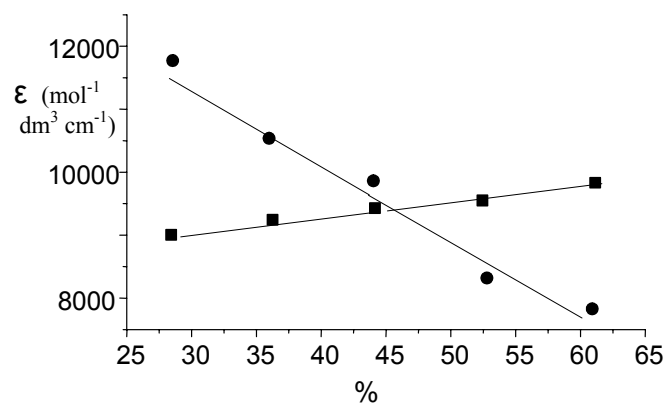

**Figure S4.**  $\epsilon$  values at 320 nm (■) and 344 nm (●) measured on solutions with different concentrations of the Cu(II) complex with L (Cu(II) and L in equimolecular ratio) at pH 6 as a function of the percentage of the dimeric species ( $[\text{Cu}_2\text{L}_2]^{4+}$ ) calculated on the basis of the potentiometric results.

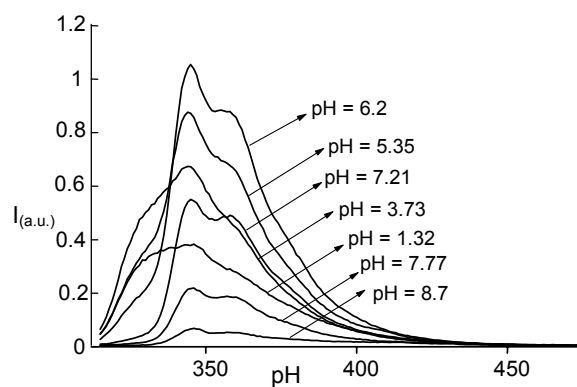

**Figure S5.** Fluorescence emission spectra recorded on aqueous solutions containing L and Zn(II) in 1:1 molar ratio at different pH values ( $[L] = 5.0 \cdot 10^{-5}$  M, 0.1 M NMe<sub>4</sub>Cl, 298.1 K)

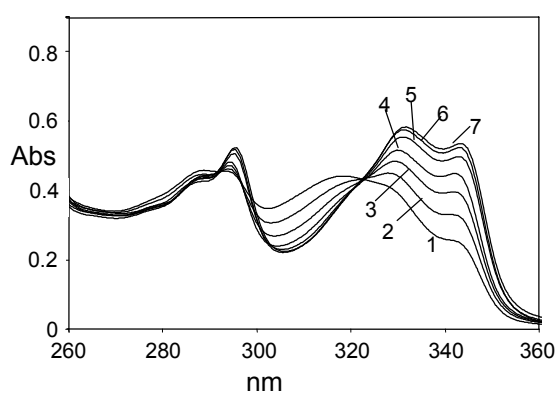

**Figure S6.** UV-Vis spectra recorded on aqueous solutions at pH 8 containing L and Cu<sup>2+</sup> at different molar ratio: (1) 1:1, (2) 1:1.25, (3) 1:1.5, (4) 1:1.75, (5) 1:2, (6) 1:2.25, (7) 1:2.5 (0.1 mol dm<sup>-3</sup> NMe<sub>4</sub>Cl, T = 298.1 K).
